# Supplementary figures and images for: How oscillating aerodynamic forces explain the timbre of the hummingbird’s hum and other animals in flapping flight
Source: eLife journal article supplement (doi:10.7554/elife.63107), 2021-03-15

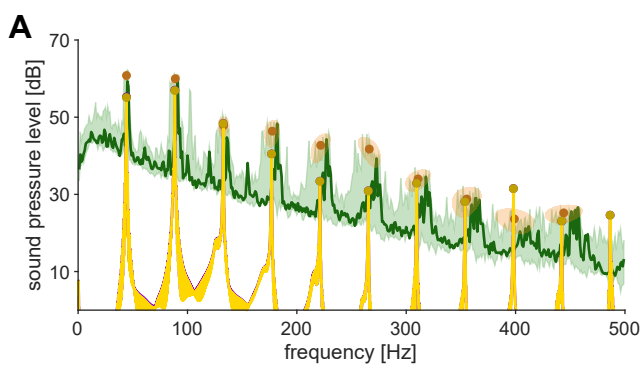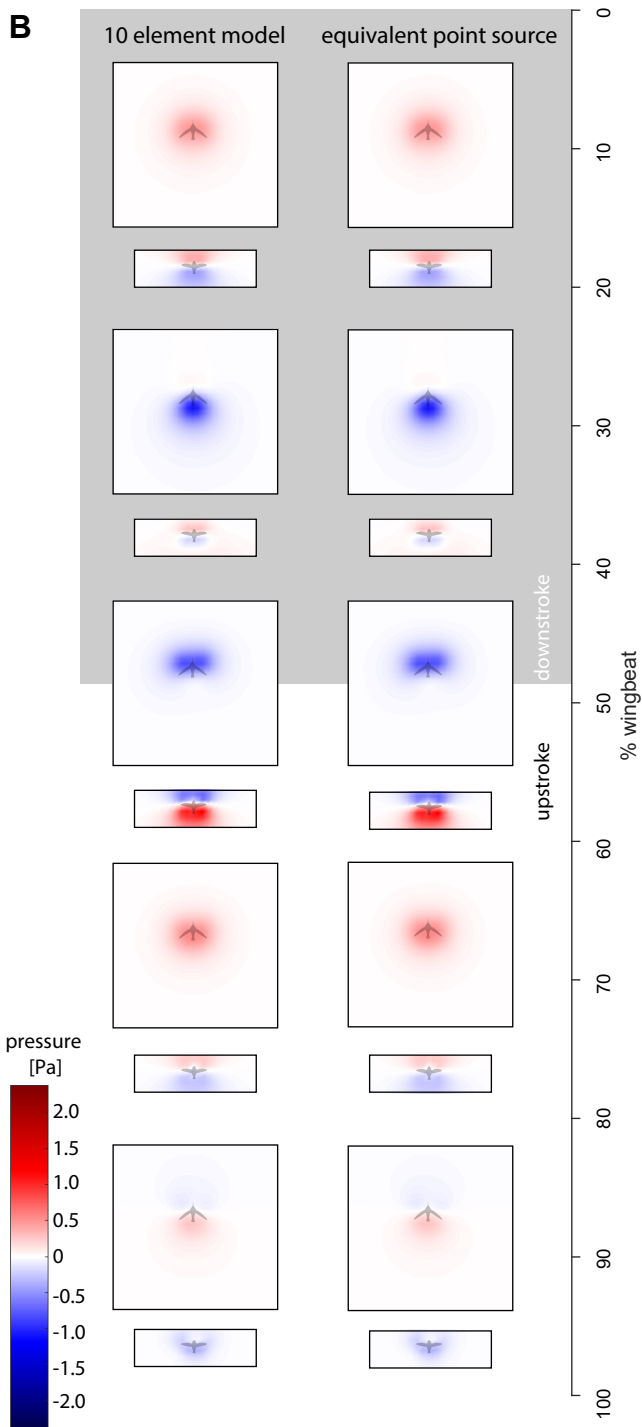

Supplement: supp [file elife_poa_e63107_Figure_2_figure_supplement_1.pdf › elife_poa_e63107_Figure_2_figure_supplement_1.pdf]

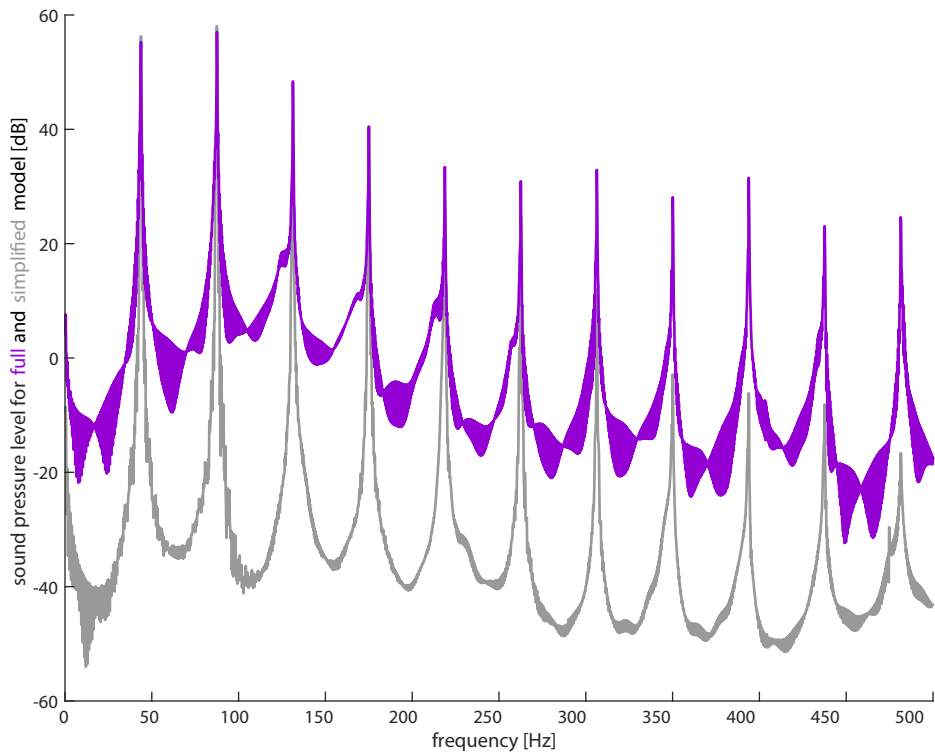

Supplement: supp [file elife_poa_e63107_Figure_2_figure_supplement_2.pdf › elife_poa_e63107_Figure_2_figure_supplement_2.pdf]

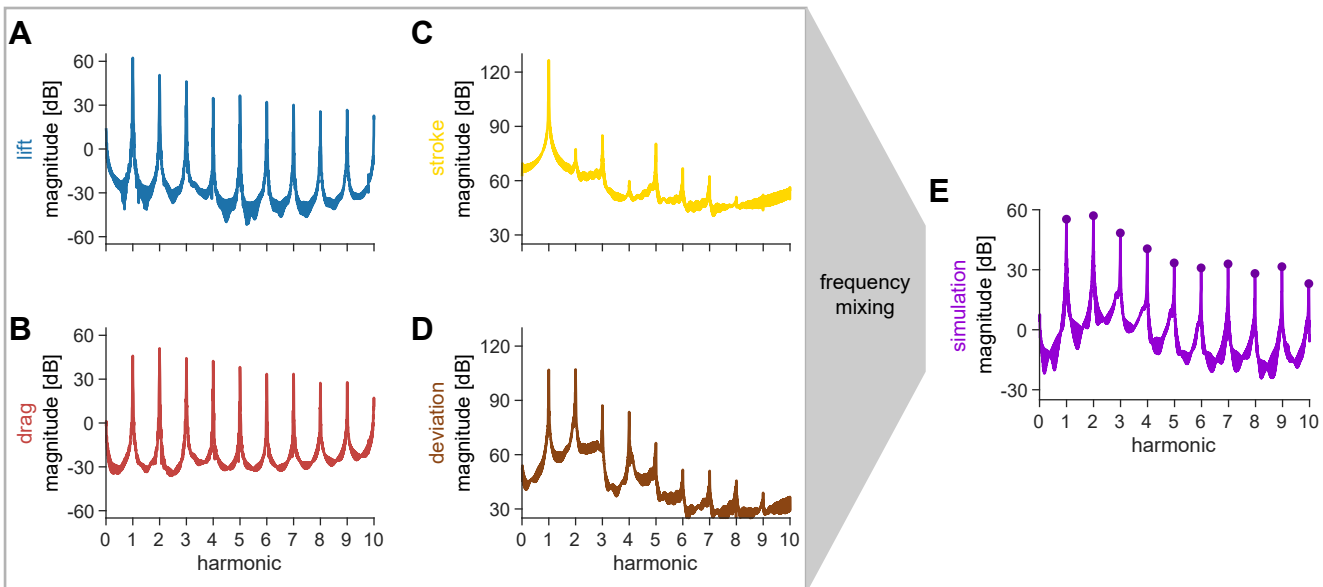

Supplement: supp [file elife_poa_e63107_Figure_2_figure_supplement_3.pdf › elife_poa_e63107_Figure_2_figure_supplement_3.pdf]

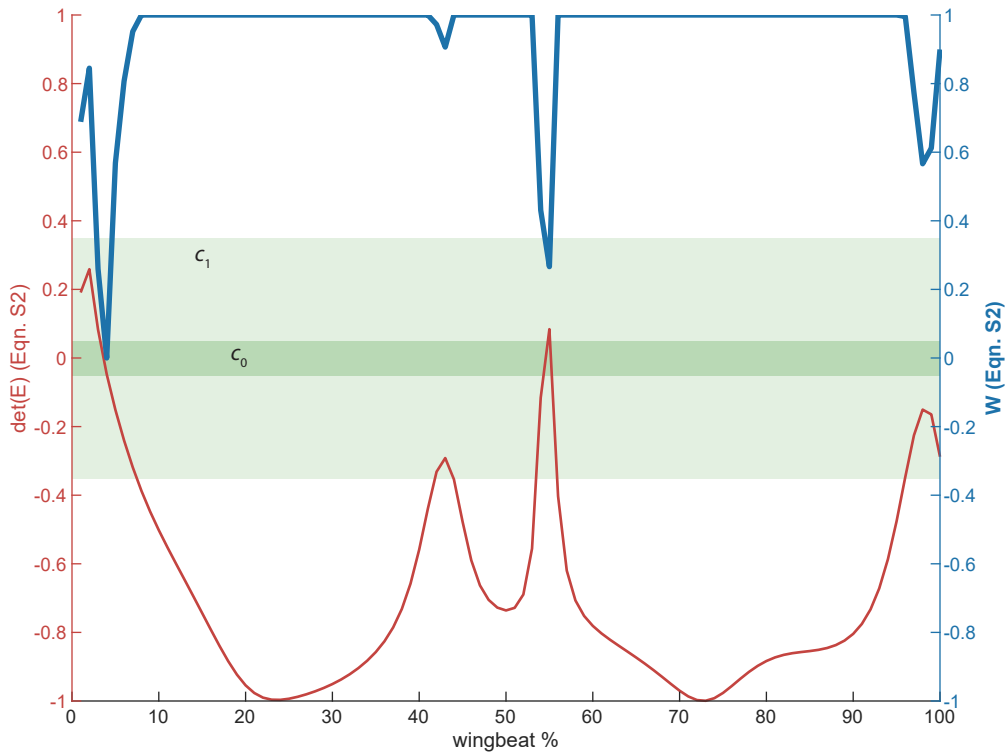

Supplement: supp [file elife_poa_e63107_Figure_2_figure_supplement_4.pdf › elife_poa_e63107_Figure_2_figure_supplement_4.pdf]

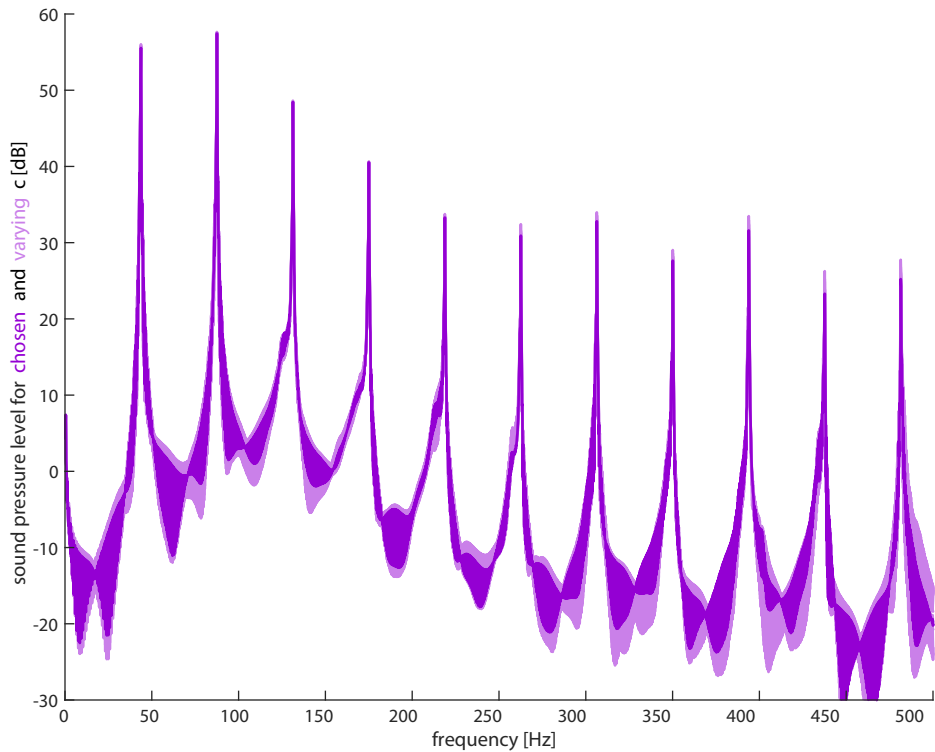

Supplement: supp [file elife_poa_e63107_Figure_2_figure_supplement_5.pdf › elife_poa_e63107_Figure_2_figure_supplement_5.pdf]

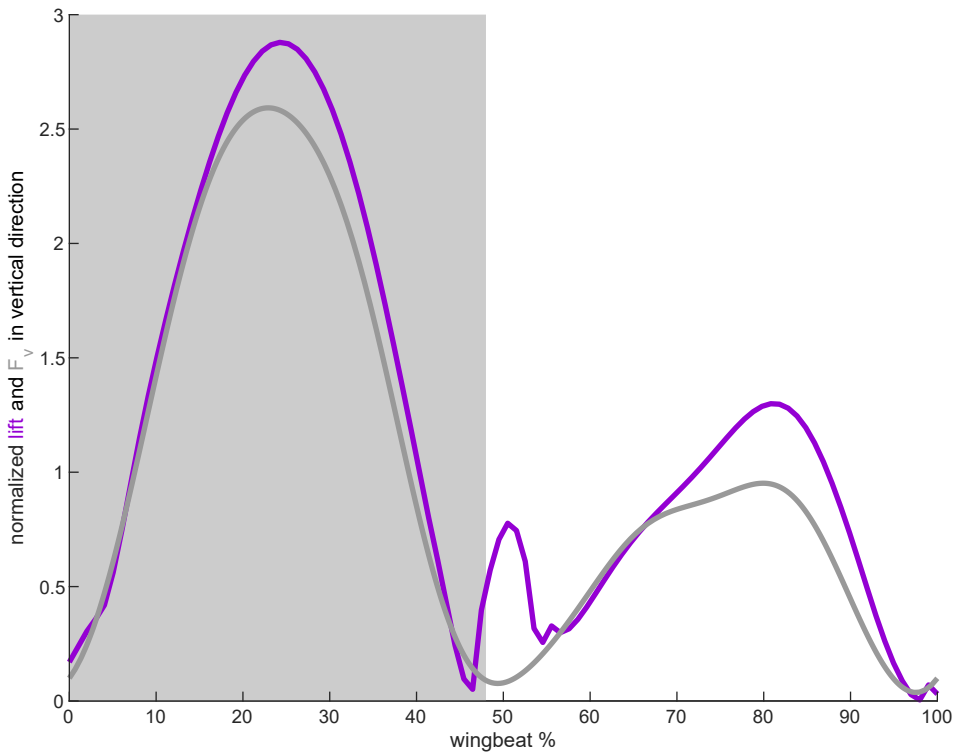

Supplement: supp [file elife_poa_e63107_Figure_2_figure_supplement_6.pdf › elife_poa_e63107_Figure_2_figure_supplement_6.pdf]

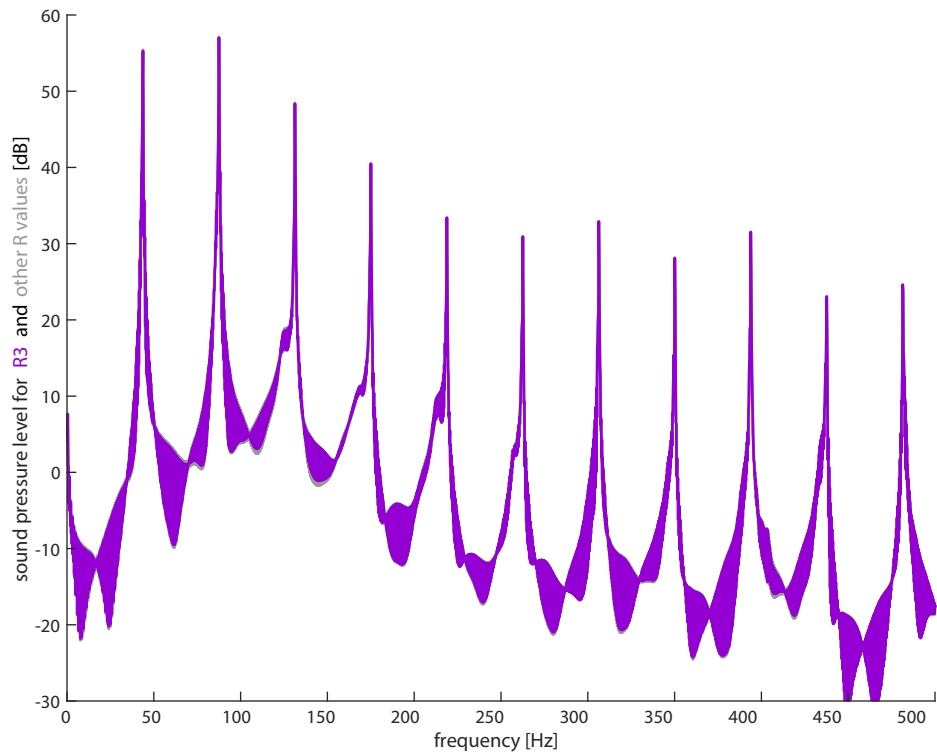

Supplement: supp [file elife_poa_e63107_Figure_2_figure_supplement_7.pdf › elife_poa_e63107_Figure_2_figure_supplement_7.pdf]

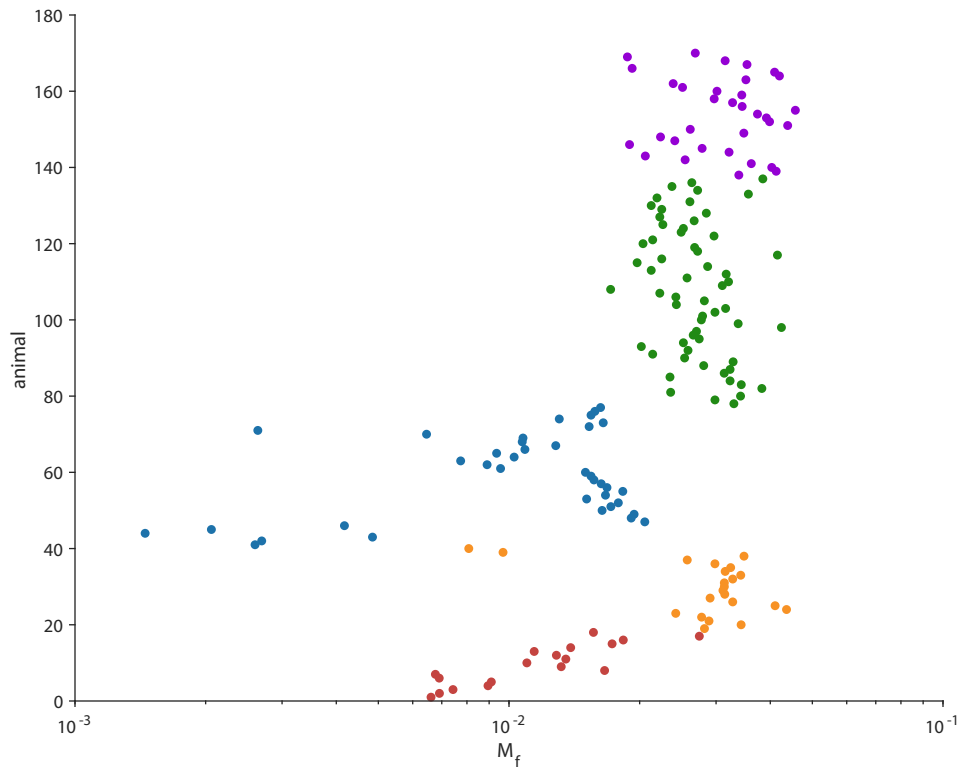

Supplement: supp [file elife_poa_e63107_Figure_4_figure_supplement_1.pdf › elife_poa_e63107_Figure_4_figure_supplement_1.pdf]

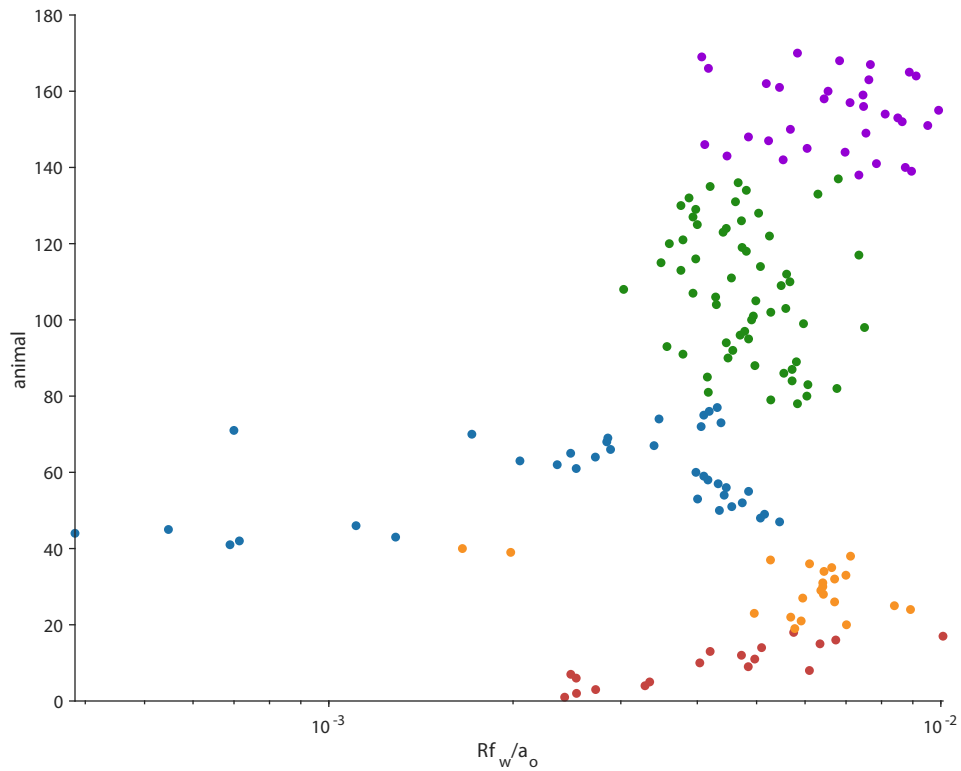

Supplement: supp [file elife_poa_e63107_Figure_4_figure_supplement_2.pdf › elife_poa_e63107_Figure_4_figure_supplement_2.pdf]
